# Supplementary material for: Activated carbon with composite pore structures made from peanut shell and areca nut fibers as sustainable adsorbent material for the efficient removal of active pharmaceuticals from aqueous media
Source: Royal Society of Chemistry journal article supplement (doi:10.1039/d4su00262h), 2024-01-01
Supplement: d4su00262h1.pdf [file d4su00262h1.pdf]

**Title: Activated carbon with composite pore structures made from peanut shell and areca nut fibers as sustainable adsorbent material for the efficient removal of active pharmaceuticals from aqueous media**

Sujata Mandal<sup>\*,†,‡,§</sup>, Dayana Stephen<sup>†,‡</sup>, Sreeram Kalarical Janardhanan<sup>†</sup>

<sup>†</sup>CLRI Center for Analysis, Testing, Evaluation and Reporting Services (CATERS), CSIR – Central Leather Research Institute, Chennai- 600020, India

<sup>‡</sup>Department of Chemistry, St. Joseph's College, Trichy-620002, India

<sup>§</sup>Present address: Advanced Materials Laboratory, CSIR – Central Leather Research Institute, Chennai- 600020, India

*\*Corresponding Author's Contact:*

Phone +91 44 24437299; Email: [sujata@clri.res.in](mailto:sujata@clri.res.in); [sujatamandal@rediffmail.com](mailto:sujatamandal@rediffmail.com)

ORCID ID: 0000-0002-0549-8851

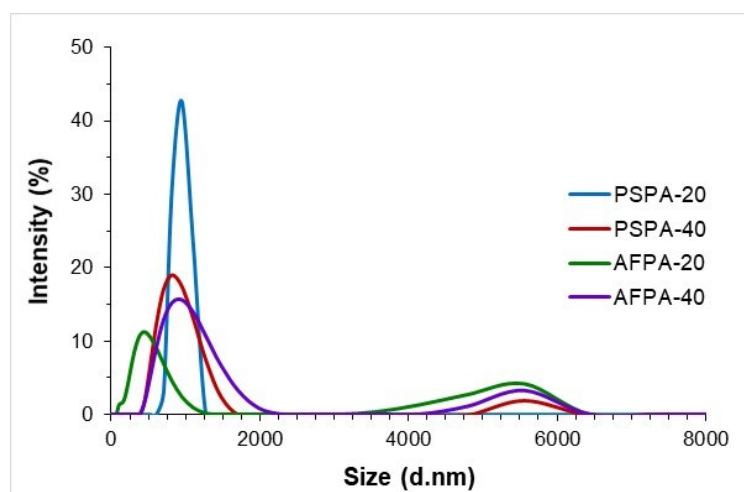

Figure S1. Particle size distribution of the activated carbon samples.

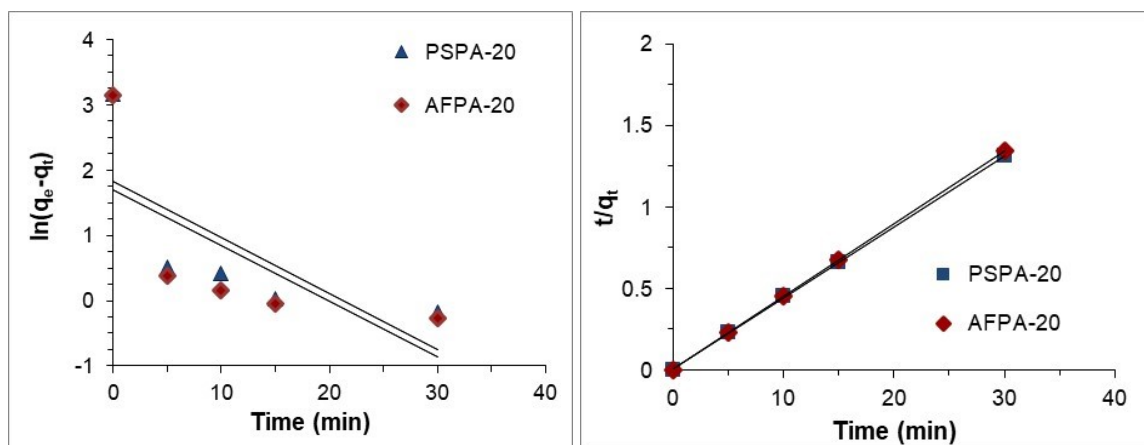

Figure S2. Plots of the Lagergen pseudo-first order and pseudo-second order models for the adsorption APAP on PSPA-20 and AFPA-20.

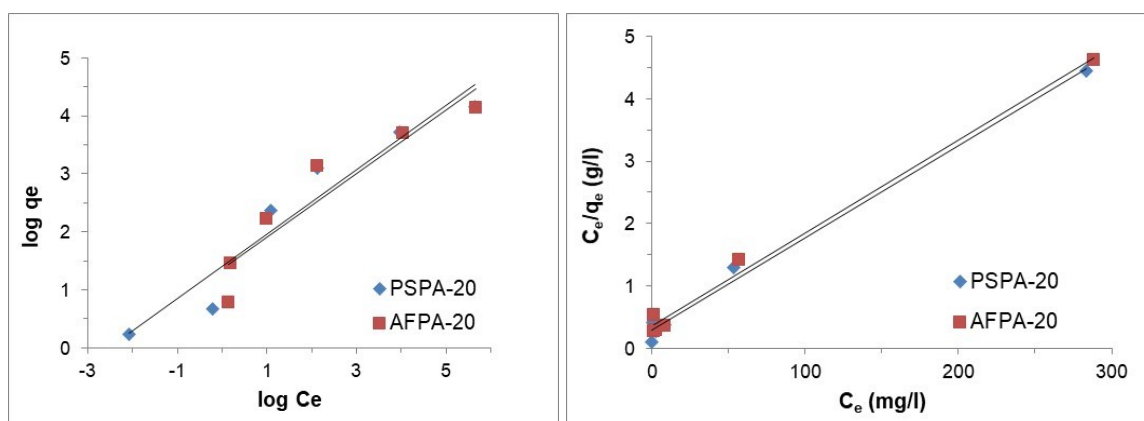

Figure S3. Plots of the Freundlich and Langmuir adsorption isotherms for the adsorption APAP on PSPA-20 and AFPA-20.
